# Supplementary material for: Bottom-up synthesis of coordination polymers based on carborane backbones and Cu2(CO2)4 paddle-wheel: ligand metathesis with metallotecons
Source: Royal Society of Chemistry journal article supplement (doi:10.1039/c2dt30708a), 2012-01-01
Supplement: c2dt30708a.pdf [file c2dt30708a.pdf]

# Bottom-Up Synthesis of Coordination Polymers based on Carborane backbones and $\text{Cu}_2(\text{CO}_2)_4$ Paddle-Wheel: Ligand metathesis with Metallotetrons

Sheng-Li Huang and Guo-Xin Jin\*

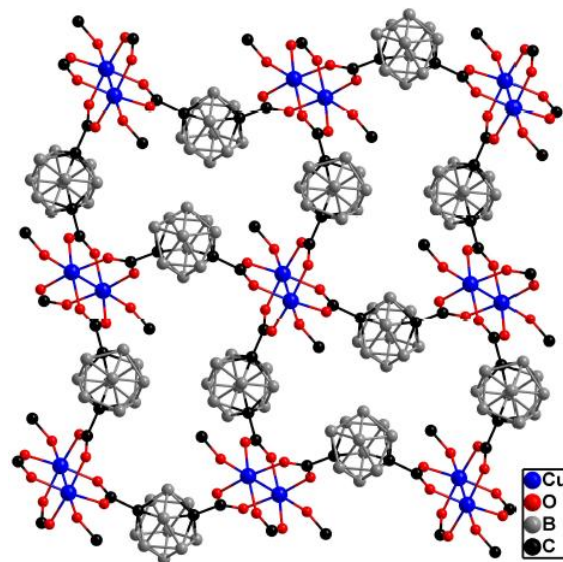

Fig. S1 Crystal structure of compound 3

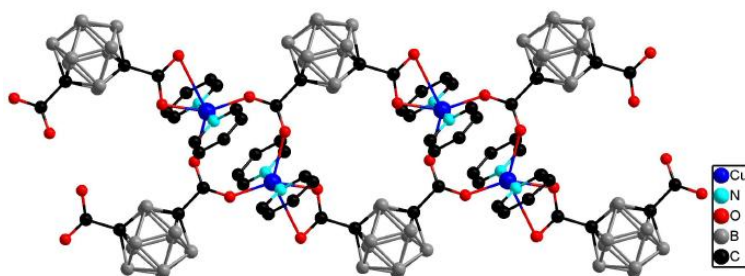

Fig. S2 Crystal structure of compound 4

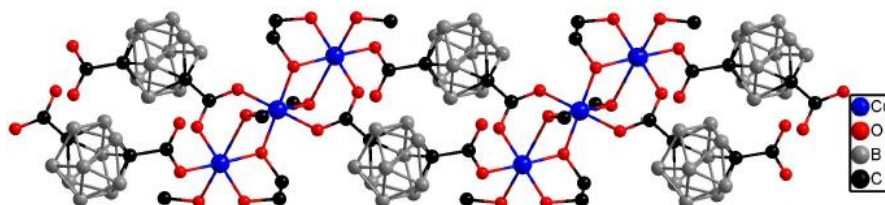

Fig. S3 Crystal structure of compound 7

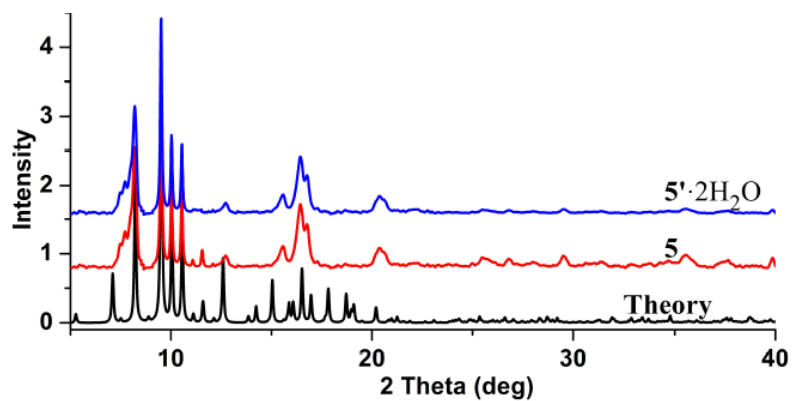

Fig. S4 PXR D patterns for different samples

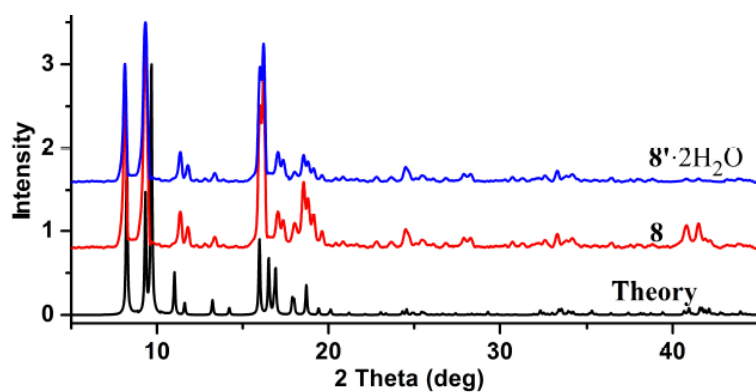

Fig. S5 PXR D patterns for different samples

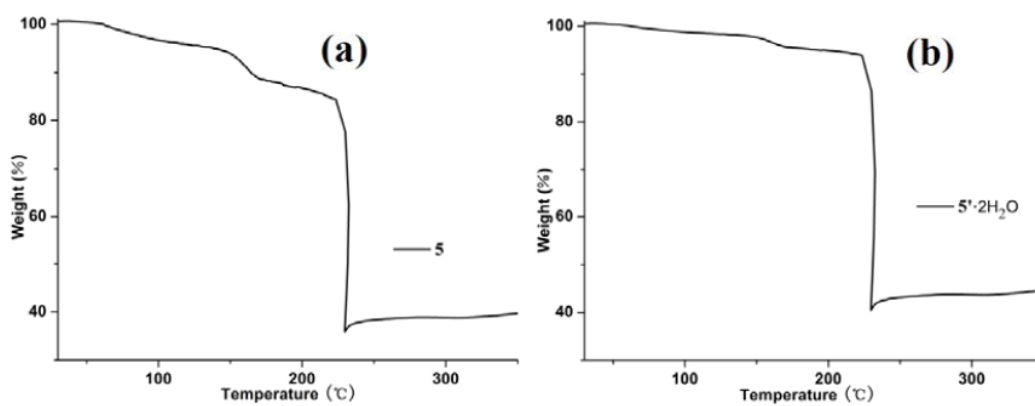

Fig. S6 TGA of compound 5 (a) and 5'·2H<sub>2</sub>O (b)

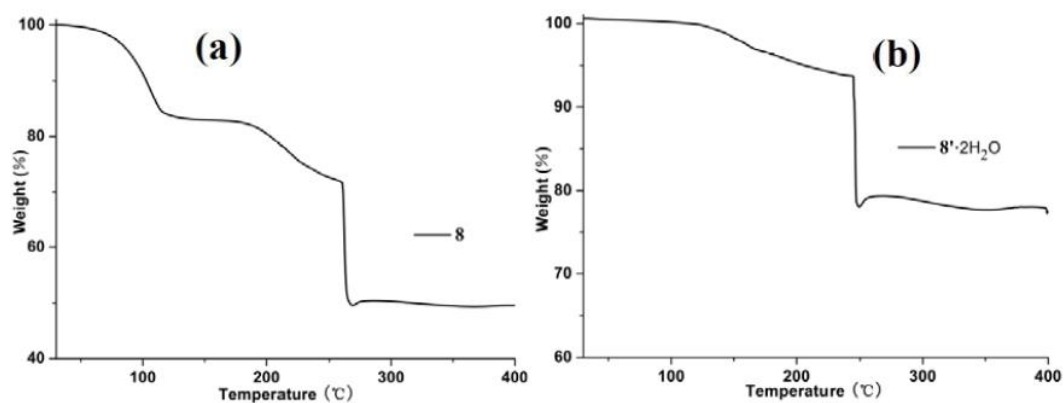

Fig. S7 TGA of compound **8** (a) and **8'·2H<sub>2</sub>O** (b)

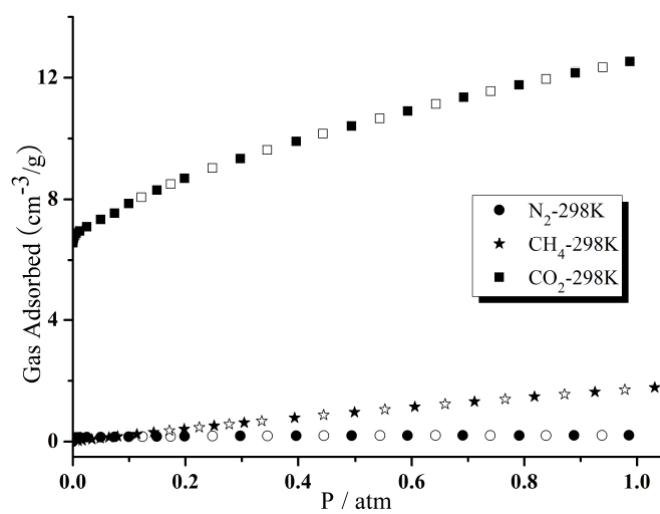

Fig. S8 Gas sorption curves of compound **5'** at 298 K

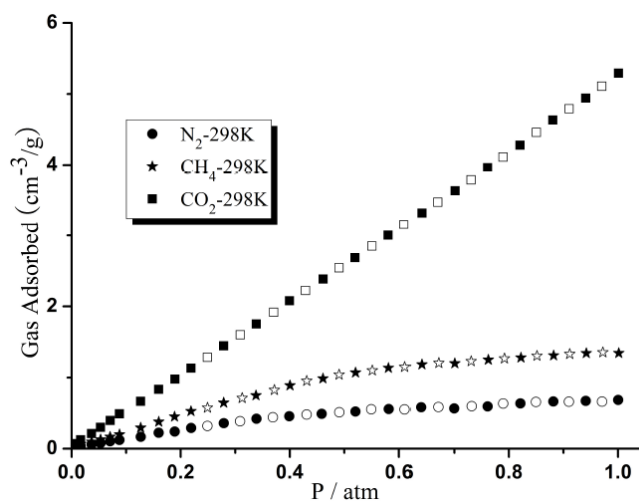

Fig. S9 Gas sorption curves of compound **8'** at 298 K

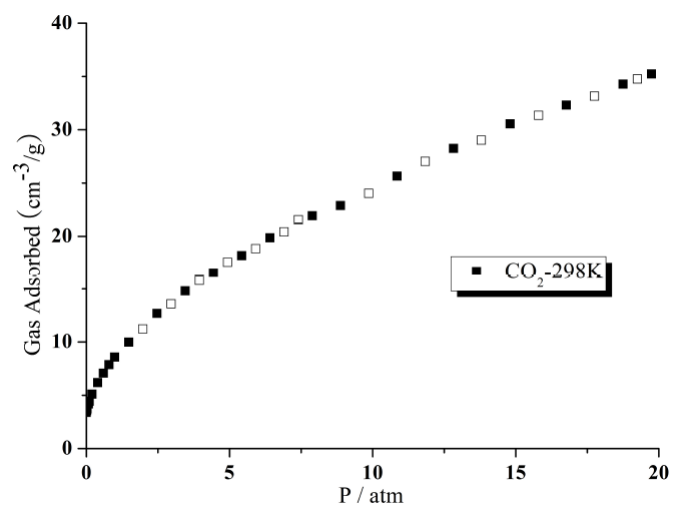

**Fig. S10** CO<sub>2</sub> sorption curve of compound 5' at 298 K
